# Supplementary material
Source: PubMed Central journal article supplement (PMC4260654)
Supplement: NIHMS642900-supplement-Table_S1.pdf [file NIHMS642900-supplement-Table_S1.pdf]

Table S1 related to Figure 3 Data collection and refinement statistics

|                                                                       | <b>Apo-<br/>RUMGNA_01526</b>               | <b>S-aFMT-<br/>RUMGNA_01526</b> |
|-----------------------------------------------------------------------|--------------------------------------------|---------------------------------|
| <b>Wavelength (Å)</b>                                                 |                                            |                                 |
| <b>Resolution range (Å)</b>                                           | 79.37 - 2.804<br>(2.905 - 2.804)           | 52.44 - 2.84<br>(2.942 - 2.84)  |
| <b>Space group</b>                                                    | P 1                                        | P 41 21 2                       |
| <b>Unit cell</b>                                                      | 58.63 145.77<br>165.07 72.85<br>88.84 88.3 | 135.03 135.03<br>249.8 90 90 90 |
| <b>Total reflections</b>                                              | 218936 (22174)                             | 730528 (73919)                  |
| <b>Unique reflections</b>                                             | 121102 (12262)                             | 55248 (5448)                    |
| <b>Multiplicity</b>                                                   | 1.8 (1.8)                                  | 13.2 (13.6)                     |
| <b>Completeness (%)</b>                                               | 94.70 (96.28)                              | 99.97 (99.96)                   |
| <b>Mean I/sigma(I)</b>                                                | 9.54 (2.09)                                | 25.80 (3.80)                    |
| <b>Wilson B-factor</b>                                                | 41.16                                      | 54.76                           |
| <b>R-merge</b>                                                        | 0.08033 (0.363)                            | 0.119 (0.8652)                  |
| <b>R-meas</b>                                                         | 0.1136                                     | 0.1238                          |
| <b>CC1/2</b>                                                          | 0.99 (0.73)                                | 0.999 (0.881)                   |
| <b>CC*</b>                                                            | 0.998 (0.919)                              | 1 (0.968)                       |
| <b>R-work</b>                                                         | 0.2311 (0.3077)                            | 0.2098 (0.2745)                 |
| <b>R-free</b>                                                         | 0.2568 (0.3623)                            | 0.2423 (0.3494)                 |
| <b>Number of atoms</b>                                                | 29598                                      | 15146                           |
| <b>macromolecules</b>                                                 | 29064                                      | 14886                           |
| <b>ligands</b>                                                        | 120                                        | 184                             |
| <b>water</b>                                                          | 414                                        | 0                               |
| <b>Protein residues</b>                                               | 3696                                       | 1889                            |
| <b>RMS(bonds)</b>                                                     | 0.002                                      | 0.007                           |
| <b>RMS(angles)</b>                                                    | 0.67                                       | 0.64                            |
| <b>Ramachandran favored (%)</b>                                       | 96                                         | 95                              |
| <b>Ramachandran outliers (%)</b>                                      | 0                                          | 0.053                           |
| <b>Clashscore</b>                                                     | 3.03                                       | 3.04                            |
| <b>Average B-factor</b>                                               | 21.2                                       | 36.4                            |
| <b>macromolecules</b>                                                 | 21.3                                       | 36.2                            |
| <b>ligands</b>                                                        | 41.8                                       | 47.9                            |
| <b>solvent</b>                                                        | 9.7                                        |                                 |
| Statistics for the highest-resolution shell are shown in parentheses. |                                            |                                 |
